## Knowledge, attitude and practice (KAP) and risk factors on dengue fever among children in Brazil, Fortaleza: A cross-sectional study

Yang Zhang<sup>1</sup>, Monica Zahreddine<sup>3</sup>, Kellyanne Abreu<sup>5</sup>, Mayana A Dantas<sup>5</sup>, Katia Charland, PhD<sup>3</sup>, Laura Pierce<sup>3</sup>, Valery Ridde<sup>4</sup>, Kate Zinszer, PhD<sup>2,3</sup>

1. School of Population and Global Health, McGill University, Montreal, Quebec, Canada
2. University of Montreal, Montreal, Quebec, Canada
3. Center for Public Health Research, University of Montreal, Montreal, Quebec, Canada
4. University Paris Cité, IRD, Inserm, Ceped, F-75006 Paris, France
5. State University of Ceará, Ceará, Brazil

Corresponding author: Kate Zinszer  
E-mail: [kate.zinszer@umontreal.ca](mailto:kate.zinszer@umontreal.ca)

## **Abstract**

### **Background**

Dengue fever is a mosquito-borne viral disease that is associated with four serotypes of the dengue virus. Children are vulnerable to infection with the dengue virus and the risk of severe dengue disease is the highest among infants and children, particularly those who have been previously infected with a different dengue serotype. Sufficient knowledge, positive attitudes, and proper practices (KAP) are essential for dengue prevention and control. This study aims to estimate the dengue seropositivity for study participants and to examine the association between households' dengue-related knowledge, attitudes, and practices (KAP), and children's risk of dengue seropositivity, while accounting for socioeconomic and demographic differences in Brazil.

### **Methodology/Principal Findings**

This analysis was based on a cross-sectional study from Fortaleza, Brazil between November 2019, and February 2020. There were 392 households and 483 participant children who provided a sample of sufficient quality for serological analysis. The main exposure was a household's dengue-related knowledge, attitudes, and practices, assessed through a questionnaire to construct a composite KAP score categorized into three levels: low, moderate and high. The main outcome is dengue immunoglobulin G (IgG) antibodies, collected using dried blood spots and assessed with Panbio Dengue IgG indirect ELISA (enzyme-linked immunosorbent assays) test commercial kits.

The estimated crude dengue seroprevalence among participating children (n=483) was 25.1%. 5% (n=20) of households achieved a score of over 75% for KAP, while most households achieved between 50% and 75% of the total scores (n=271, 69%), and 101 households scored

lower than 50% of the total score (26%). Each KAP domain was significantly and positively associated with the others. We found high household KAP scores were associated with an increased risk of seropositivity (RR: 2.08, 95% CI: 1.09-3.97,  $p=0.027$ ). Household adult respondents' education level of elementary school or higher was negatively associated with children's relative risk of being seropositive (RR: 0.65, 95% CI: 0.49-0.87,  $p=0.004$ ). The risk of seropositivity in older children (6-12 years old) was over 6 times that of younger children (2-5 years old) (RR: 6.15, 95% CI: 3.51-10.76,  $p<0.001$ ). Children living in households with sealed water tanks or no water storage had a lower relative risk of being seropositive (RR: 0.73, 95% CI: 0.55-0.99,  $p=0.041$ ).

## **Conclusions/Significance**

Our results provide insight into the prevalence of dengue seropositivity in Fortaleza, Brazil in children, and certain demographic and socioeconomic characteristics associated with children's risk of being seropositive. They also suggest that KAP may not identify those more at risk for dengue, although understanding and enhancing households' KAP is crucial for effective community dengue control and prevention initiatives.

## **Author summary**

Dengue fever has become an increasing threat to public health, with its global expansion and increased presence in dengue endemic countries. This study provides insight into the prevalence of dengue seropositivity in children in Fortaleza, Brazil, a city which has been a hotspot for arbovirus infections. We estimated seroprevalence for certain study population characteristics and identified characteristics that were associated with an increased risk of dengue seropositivity. We also explored the associations of a composite measure of knowledge, attitudes, and practice (KAP) with seropositivity and found an inverse relationship between KAP for dengue control

and children's seropositivity. KAP could change due to previous infection experience, which is a potential limitation of using KAP as a potential predictor of dengue seropositivity in cross-sectional studies. Despite this, KAP remains useful for identifying gaps in knowledge, attitude, and practice that can be used to inform public health measures, such as education campaigns. Measures of social acceptability of interventions should also be considered for inclusion in similar studies, as it would provide an indication of likelihood of adoption of interventions, which provides additional insight for different dengue interventions.

## Introduction

Dengue fever is a mosquito-borne viral disease that is associated with four serotypes of the dengue virus.<sup>1</sup> Dengue is an expanding threat to public health globally and the leading cause of serious illness and death among children in several Asian and Latin American countries.<sup>1</sup>

Children are susceptible to infection with dengue virus, and the risk for severe dengue disease is highest among infants and children with secondary heterologous dengue infections.<sup>2</sup> Brazil, the largest country in South America, is experiencing increased dengue incidence, with over 1.5 million cases reported in 2019.<sup>3</sup> A complex mixture of demographic and socio-economic factors influences the distribution and transmission of dengue,<sup>4</sup> which include inadequate living conditions, immunologically naïve populations, global trade and population mobility, climate change, and the adaptive nature of the principal mosquito vectors *Aedes aegypti* and *Aedes albopictus*.<sup>5-8</sup>

Given that dengue vaccines are not suitable nor available for all dengue-endemic countries and anti-viral medications are not available, control of the mosquito vectors and reducing human-vector contact are recognized as the primary strategies for dengue prevention.<sup>9</sup> *Aedes aegypti* and *Aedes albopictus* are opportunist mosquitoes adapted to urban environments.<sup>10</sup> Precipitation and

open water storage create sites for breeding and aquatic stages of the mosquito's life cycle.<sup>11</sup> In several Brazilian cities, residents store clean water in open containers and water reservoirs creating ideal sites for *Aedes* within and near the households.<sup>12</sup> Poor quality housing and sanitation management with high population density are key determinants for the sustained propagation of dengue.<sup>13</sup>

Measures of knowledge, attitudes, and practices (KAP) are common and used to identify knowledge gaps, evaluate awareness levels and assess behavioural patterns among members of the community, that may facilitate understanding and public health action.<sup>14</sup> High levels of KAP can empower individuals to participate in disease control and prevention programs.<sup>15</sup> Although there have been several studies assessing KAP and its relationship to dengue risk in different populations, little is known about the link between households' KAP, demographic and socio-economic characteristics and children's dengue seropositivity. The primary objectives of this analysis were to estimate dengue seroprevalence in a pediatric study population and to examine the associations between households' dengue-related KAP and children's dengue seropositivity.

## **Methods**

### **Study Design**

This analysis is based on cross-sectional data collected as part of the baseline data collection of a larger international research project.<sup>16</sup> The original project was a pragmatic cluster randomized controlled trial (cRCT) in Fortaleza, Brazil, which aimed to evaluate a community mobilization intervention for dengue control. The study initially planned to collect data from 68 clusters with a target recruitment of 5,848 children between 2 and 12 years old. Due to the pandemic and instability in the study region, the baseline data collection terminated before data from all

clusters were gathered. The team was able to collect complete data from four clusters and partial data from seven clusters, between November 2019 and February 2020.

## **Eligibility Criteria and Study Procedure**

Households in selected clusters were eligible to participate if there were children between 2 to 12 years old living in the household, and if both the parent or legal guardian and the child gave consent for the data collection. Households and children with contaminated blood samples and/or with indeterminate serology results were excluded from this analysis.

Household surveys were administered to the principal adult respondent of each household in Portuguese by a trained interviewer during door-to-door visits. Household surveys included questions about living conditions, socioeconomic status, social capital, and basic health history of the participating children. Respondents were also asked questions related to dengue knowledge, attitudes, and practice (KAP).

## **Knowledge, Attitudes, and Practice**

The KAP module consisted of partially categorized questions as well as multiple choices, dichotomous and Likert scale responses. Five questions in the knowledge domain gauged awareness of dengue symptoms, modes of transmission, and techniques for dengue prevention. Five questions in the attitude domain assessed perceptions about dengue, and opinions and acceptability of dengue prevention practices. There were six items in the practice domain related to the adoption of preventive practices and dengue treatment seeking behaviour. A scoring system was applied to create a KAP index, with maximum scores of 10, 8, and 10.5 points for knowledge, attitude, and practice, respectively. Households' total KAP score (maximum of 28.5 points) were categorized into groups: low (<15 points or <50% of maximum points), moderate

(>15 or <22 points or between 50% to 75% of maximum score) or high (>22 points or >75% of the maximum score).<sup>17</sup>

## **Seroprevalence test**

Dried blood spot samples were collected from children by a finger prick performed by a trained nurse technician. All samples were placed on filter paper and were anonymized with a study ID code during collection. Three circles of 15 mm each were filled with capillary blood and allowed to dry at least 2 to 6 hours at room temperature, avoiding exposure to sunlight. Once dried, each card was packaged separately in a hermetic plastic bag containing silica desiccant. DBS samples were then refrigerated until assessment for quality control purposes, standards of sufficient quantity of blood or layering of blood drops is available elsewhere<sup>18</sup>, and then stored in a freezer at -20 °C until further processing. Dengue seropositivity was defined as the detection of immunoglobulin G (IgG) antibodies to dengue antigen serotypes (1, 2, 3, and 4) using the Panbio Dengue IgG indirect ELISA (enzyme-linked immunosorbent assays). To ensure high-quality data collection, a field supervisor was present for both blood collection and questionnaire administration.

Data collection for the study was approved by the University of Montreal's Comité d'éthique de la recherche en sciences et en santé (CERSES) and the Comité de Ética em Pesquisa da Universidade Estadual do Ceará (State University of Ceará, reference number 3.083.892).

Approval for the study was obtained from the Ethical Review Committee for Scientific Research of Brazil's National Ethics Council for Research.

## **Statistical Analyses**

The primary outcome of this study was dengue seropositivity (negative or positive).

Seroprevalence with 95% confidence intervals were estimated using a one-proportion z-test. We

conducted Chi-squared tests to examine the relationship of each domain of KAP (low, moderate, high) with dengue seropositivity. Kendall rank correlation tests were used to assess the associations between each pair of KAP domains (i.e., K and A, K and P, A and P). The associations between sociodemographic covariates and seropositivity were assessed through univariate regression. A multivariable regression model was then developed to assess associations between risk of seropositivity and potential predictors of risk including KAP, age, race, average monthly household income, household water storage method, household's recent dengue episode and dengue death history, and the education level and occupation status of the household's principal adult respondent. The selection of variables was guided by hypothesized causal associations and confounders through literature review and direct acyclic graphs. For both univariate analyses and multivariable regression models, relative risks (RR) and 95% confidence intervals were estimated based on Zou's modified Poisson regression approach<sup>19</sup>; an alternative to logistic regression that provides estimates of relative risk, rather than odds ratios, when the outcome is common.

Children's ages were divided into two groups: 2-5 years old and 6 to 12 years old. Children's race was classified into five categories, based upon the classification used by the *Instituto Brasileiro de Geografia e Estatística* which is used for the Brazilian census: *Branco* (White), *Pardo ou moreno* (Multiracial), *Preto* (Black), *Asiático* (Asian), and *Indígena* (Indigenous).<sup>20</sup> We distinguished between households with no potable water storage and sealed individual water tanks from households with open water storage methods (e.g., buckets, pots).<sup>22</sup> Households were considered to have dengue history if they experienced a recent dengue episode or the death of a family member due to dengue. Household education level of the adult respondent was categorized based upon completion of elementary school as elementary school is essential for an



individual's literacy. There were two categories of occupation status, respondents who had paid employment at the time of the questionnaire vs being unemployed, retired and other (e.g., refused to answer). Households' monthly income were categorized as low (<500 Brazilian real), moderate (>500 or <2500 Brazilian real) or high (>2500 Brazilian real) based on Fortaleza's cost of living and the average household income of the resident population from the Ceara state.<sup>20,21</sup>

All statistical analyses were conducted using R version 4.2.0.

## Results

### Characteristics of Participating Households and Children

There were 392 households and 483 children who provided a blood sample of sufficient quality for this analysis. The mean age of participating children was 6.5 years with an almost equal proportion of boys and girls participating in the study (Table 1). The mean age (SD) of household principal adult respondents was 29 years with the majority being female (n=345, 88%). Children were most often reported as being multiracial (n=285, 73%). Parental respondents had a high completion rate of elementary school (n=276, 70%) and most households had a moderate household income (n=354, 65%).

**Table 1. Sociodemographic Characteristics of Children and Households**

| Children               | Total (N=483)     |
|------------------------|-------------------|
| <b>Child Age, year</b> |                   |
| Mean (SD)              | 6.54 (2.74)       |
| Median [Min, Max]      | 6.00 [2.00, 12.0] |
| 2-5                    | 181 (50%)         |

|                                        |                      |
|----------------------------------------|----------------------|
| 6-12                                   | 181 (50%)            |
| <b>Child Race</b>                      |                      |
| Multiracial                            | 308 (63.8%)          |
| White                                  | 126 (26.1%)          |
| Black                                  | 31 (6.4%)            |
| Yellow                                 | 12 (2.5%)            |
| Other                                  | 6 (1.2%)             |
| <b>Child Gender</b>                    |                      |
| Female                                 | 222 (46.0%)          |
| Male                                   | 261 (54.0%)          |
| <b>School Attendance</b>               |                      |
| Yes                                    | 431 (89.2%)          |
| No                                     | 50 (10.4%)           |
| Refused                                | 2 (0.4%)             |
| <b>Households</b>                      | <b>Total (N=392)</b> |
| <b>Household Monthly Income (BRL)*</b> |                      |
| Low                                    | 21 (5.4%)            |
| Moderate                               | 254 (64.8%)          |

|                              |             |
|------------------------------|-------------|
| High                         | 79 (20.2%)  |
| <b>Respondent Education</b>  |             |
| Lower than Elementary School | 116 (29.6%) |
| Elementary School or Higher  | 276 (70.4%) |
| <b>Respondent Gender</b>     |             |
| Female                       | 345 (88.0%) |
| Male                         | 44 (11.2%)  |
| Does not know                | 3 (0.8%)    |
| <b>Respondent Race</b>       |             |
| Black                        | 28 (9.7%)   |
| Multiracial                  | 285 (72.7%) |
| White                        | 55 (14.0%)  |
| Asian                        | 10 (2.6%)   |
| Other                        | 4 (1.0%)    |
| <b>Occupation</b>            |             |
| Retired/Unemployed/Other     | 202 (51.5%) |
| Employed                     | 190 (48.5%) |
| <b>Household KAP</b>         |             |

|          |             |
|----------|-------------|
| Low      | 101 (25.8%) |
| Moderate | 271 (69.1%) |
| High     | 20 (5.1%)   |

\*BRL= Brazilian real

Table 2 shows crude seroprevalence, seroprevalence differences and ratios for children by individual characteristics. There were 121 seropositive samples and 362 seronegative samples, resulting in an estimated crude seroprevalence of 25.1% (95% CI: 21.3% - 29.2%).

**Table 2. Crude Seroprevalence and Seroprevalence Differences and Ratios for Children by Individual Characteristics**

|                        | <b>Children, No. /Total No. (%)</b> |                     | <b>Seroprevalence, % (95% CI)</b> | <b>Crude prevalence ratio (95% CI)</b> |
|------------------------|-------------------------------------|---------------------|-----------------------------------|----------------------------------------|
|                        | <b>Seronegative</b>                 | <b>Seropositive</b> |                                   |                                        |
| <b>Total</b>           | 362 (74.9)                          | 121 (25.1)          | 25.1 (21.3 to 29.2)               | NA                                     |
| <b>Child Age, year</b> |                                     |                     |                                   |                                        |
| Mean (SD)              | 6.54 (2.74)                         |                     |                                   |                                        |
| 2-5                    | 181/362(50)                         | 12/121(10)          | 6.2 (3.4 to10.9)                  | 1 [Reference]                          |
| 6-12                   | 181/362(50)                         | 109/121(90)         | 37.6 (32.0 to 43.5)               | 6.1 (3.4 to 10.7)                      |
| <b>Child Race</b>      |                                     |                     |                                   |                                        |
| Multiracial            | 238/362 (66)                        | 70/121(58)          | 22.7 (18.3 to 27.9)               | 1 [Reference]                          |

|                          |              |             |                     |                  |
|--------------------------|--------------|-------------|---------------------|------------------|
| White                    | 88/362 (24)  | 38/121(31)  | 30.2 (22.5 to 39.1) | 1.3 (0.9 to 1.9) |
| Black                    | 21/362 (6)   | 10/121(8)   | 32.3 (17.3, 51.5)   | 1.4 (0.8 to 2.5) |
| Yellow                   | 11/362 (3)   | 1/121(1)    | 8.3 (0.4 to 40.2)   | 0.4 (0.1 to 2.5) |
| Other                    | 4/362 (1)    | 2/121(2)    | 3.3 (6.0 to 75.9)   | 1.5 (0.5 to 4.6) |
| <b>Child Gender</b>      |              |             |                     |                  |
| Female                   | 162/362 (45) | 60/121      | 27.0 (21.4 to 33.5) | 1 [Reference]    |
| Male                     | 200/362 (55) | 61/121      | 23.3 (18.5 to 29.1) | 0.8 (0.5 to 1.2) |
| <b>School Attendance</b> |              |             |                     |                  |
| Yes                      | 313/362 (86) | 118/121(98) | 27.4 (23.3, 31.9)   | 1 [Reference]    |
| No                       | 48/362(13)   | 2/121(2)    | 4 (0.7 to 14.9)     | 0.1 (0.0 to 0.5) |
| Refused                  | 1/362 (<1)   | 1/121(<1)   | 50 (9.5 to 90.5)    | 2.7(0.2 to 42.8) |

## **Knowledge, Attitudes, Practices and Overall KAP**

Only five percent (n=20) of households achieved over 75% for overall KAP, while most households achieved scores between 50% and 75% (n=271, 69%), and 101 households scored lower than 50% of the total score (26%). The results of the Kendall rank correlation tests and Chi-squared tests demonstrate that the three domains have a statistically significant positive association with each other. However, in univariate tests there was no evidence of an association between children's seropositivity and the household's level of each individual domain (knowledge, practice, or attitude) or with the overall KAP measure.

## Demographic and Socioeconomic Determinants of Dengue Seropositivity in Children

In the multivariable regression model, the parental education level, households' KAP level, age of the child, and household water storage method were shown to be significantly associated with the risk of dengue seropositivity in children (Table 3).

**Table 3. Multivariable Regression Model of Sociodemographic Predictors of Children's Serology Results**

| Characteristic         | Levels                             | RR <sup>1</sup> | 95%CI <sup>1</sup> | p-value    |
|------------------------|------------------------------------|-----------------|--------------------|------------|
| Household KAP          | Low                                | REF             | REF                | REF        |
|                        | Moderate                           | 1.18            | [0.82, 1.69]       | 0.382      |
|                        | High                               | 2.08            | [1.09, 3.97]       | 0.027*     |
| Respondent's Education | Less than Elementary School        | REF             | REF                | REF        |
|                        | Elementary School or Higher        | 0.65            | [0.49, 0.87]       | 0.004**    |
| Child Age              | Younger Group (2-5 years old)      | REF             | REF                | REF        |
|                        | Older Group (6-12 years old)       | 6.15            | [3.51, 10.76]      | < 0.001*** |
| Child Race             | Other                              | REF             | REF                | REF        |
|                        | Multiracial/White                  | 1.02            | [0.65, 1.60]       | 0.940      |
| Water Storage Method   | Other Water Storage Method         | REF             | REF                | REF        |
|                        | Sealed Water Tank/No Water Storage | 0.73            | [0.55, 0.99]       | 0.041*     |
| Respondent's           | Retired/Unemployed/Other           | REF             | REF                | REF        |

|                             |          |      |              |       |
|-----------------------------|----------|------|--------------|-------|
| Occupation                  | Employed | 0.76 | [0.56, 1.02] | 0.067 |
| Household Dengue Experience | Yes      | REF  | REF          | REF   |
|                             | No       | 0.79 | [0.57, 1.09] | 0.152 |
| Household's Monthly Income  | Low      | REF  | REF          | REF   |
|                             | Moderate | 0.92 | [0.51, 1.65] | 0.778 |
|                             | High     | 1.23 | [0.65, 2.36] | 0.526 |
|                             | Other    | 1.39 | [0.72, 2.66] | 0.329 |

<sup>1</sup> RR=Relative Risk, CI= Confidence Interval

\*Other is individuals who refused to answer

Among all included predictors, children's age was most strongly associated with the risk of dengue seropositivity, which was significantly higher among children aged 6-12 years compared to children aged 2-5 years old (RR: 6.2, 95% CI: 3.4-10.7,  $p < 0.001$ ). Children of parents with higher education levels, who at least completed elementary school, were less likely to be seropositive (RR: 0.7, 95% CI: 0.5-0.9,  $p = 0.004$ ). There were no statistically significant associations detected between dengue seropositivity and monthly household income, principal adult's occupation, children's race, or household's dengue history. Children living in households without potable water storage or using sealed water tanks were found to be significantly associated with a lower risk of dengue seropositivity (RR: 0.7, 95% CI: 0.6-1.0,  $p = 0.041$ ). Notably, our result showed that higher values of KAP were associated with an increased risk of dengue seropositivity (RR: 2.1, 95% CI: 1.1-4.0,  $p = 0.027$ ).

## Discussion

The results of our study demonstrated that one quarter of the participating children were seropositive for dengue and the results identified certain socioeconomic and demographic characteristics that were associated with the risk of dengue seropositivity. The results also suggest that KAP was not a protective predictor of dengue seropositivity risk in our cross-sectional study, considering it was positively associated with seropositivity.

The overall dengue seroprevalence was comparable to other dengue seroprevalence studies of children in dengue-endemic settings.<sup>23, 24</sup> We also found that the seroprevalence varied widely between different sociodemographic factors such as race, sex, and age. Black and white children had the highest seroprevalence compared to multiracial and other groups although given the low number of seropositive children in certain racial groups, these differences should be interpreted with caution. Associations between racial and ethnic minority status and dengue seropositivity have been found by other studies,<sup>25-27</sup> and race is often related to increased vulnerability of disease due to social conditions including housing, municipal services, and education.<sup>28</sup>

Girls were estimated to have a higher dengue seroprevalence compared to boys, although the difference was statistically insignificant. There are a mixture of findings in terms of gender differences in dengue incidence, some have found greater male dengue incidence among both children and adults which is likely due to gender-related differences in exposure such as time away from home and participation in outdoor games,<sup>29-32</sup> while others have found no differences.<sup>33, 34</sup> In our study, we also found that children's age was positively associated with seropositivity, which is comparable to many similar studies.<sup>35-37</sup> Considering IgG remains detectable in blood for many years,<sup>38</sup> children in the older group (6-12 years old) had a longer



time at risk of infection compared to younger children. Previous studies have determined that the majority of dengue virus transmission occurs within communities or schools, school attendance could play an important role in the progression of dengue epidemics given the increases in the dengue infection rate following the beginning of the school year.<sup>39-41</sup>

Children were 35% less likely to be seropositive if the parent/guardian respondent had at least completed elementary school, compared to those children whose parent/guardian had lower educational attainment. Multiple studies have demonstrated that education was positively associated with the use and promotion of dengue prevention, such as ability to take actions of control, acceptability of prevention measures and educating family members and neighbors.<sup>42,43</sup> Our study also suggests that water storage methods are important in terms of risk of dengue seropositivity in children, which has been found by several other studies.<sup>22,44,45</sup> Open containers and unsealed reservoirs can act as important breeding sites for *Aedes* mosquitos,<sup>12,22,45</sup> while piped water and sealed reservoirs can reduce the presence of *Aedes* mosquitos significantly.<sup>12,22</sup>

An interesting finding from our study is that children living in households with high KAP levels had a higher relative risk of dengue seropositivity. One hypothesis for this finding is related to our outcome measure and an important limitation of cross-sectional data - a lack of temporality. We did not measure active dengue infections but measured dengue seropositivity using IgG, which can persist in the blood for several years.<sup>38</sup> It is plausible that this inverse association is due to a mismatch of temporality between our outcome and exposure of interest. Case-control and cohort studies have found lower KAP scores were associated with higher dengue infection risk, especially among children without dengue experience, scores in the practice domain are

significantly lower. Therefore, if a child had a previous dengue infection, it is likely that this experience improved the KAP in the household.<sup>46,47</sup>

## Limitations

The study has several limitations. The main limitation is the cross-sectional design with exposure and outcome measured at the same time, making it impossible to establish temporality in the associations. KAP can change substantially over time and in response to certain events, such as previous dengue infection. There is likely selection bias, as the response rate varied by clusters and decreased throughout the study due to the political context. Information bias could have occurred with the questionnaire data collection given that it was based on self-reported information, particularly for the KAP questions, although we assume that the impact would be non-differential. Also, the diagnostic test had 97.9% sensitivity and 100% specificity,<sup>18</sup> which likely reduced both the sensitivity and specificity of the test.<sup>48</sup> This may have led to misclassification of serostatus. Confounding bias could have occurred via residual confounding as we reduced the number of categories within certain variables to improve the precision of our results. In terms of external validity or generalizability, the study population was representative of Fortaleza in terms of race and reported household income, although may not have been representative for study characteristics.<sup>20, 21</sup>

## Conclusion

We found certain demographic and socio-economic characteristics, particularly children's age, parent's education, and water storage method were associated with children's risk of seropositivity. We also identified an important limitation of using KAP measures for cross-sectional studies for dengue infection: KAP could change due to previous infection experience,

which is likely relevant for other infectious diseases. Despite this limitation of using KAP as a potential predictor of dengue seropositivity in cross-sectional studies, it remains useful for identifying gaps in knowledge, attitude, and practice that can be used to inform public health measures, such as education campaigns. Measures of social acceptability of interventions<sup>49</sup> should also be considered for inclusion in similar studies, as it would provide an indication of likelihood of adoption of interventions, which provides additional insight for different dengue interventions.

## References

1. Dengue and severe dengue [Internet]. World Health Organization. World Health Organization; [cited 2022Oct24]. Available from: <https://www.who.int/news-room/fact-sheets/detail/dengue-and-severe-dengue#:~:text=Dengue%20is%20caused%20by%20a,lifelong%20immunity%20against%20that%20serotype>.
2. Jain A, Chaturvedi UC. Dengue in infants: An overview. *FEMS Immunology & Medical Microbiology*. 2010;59(2):119–30.
3. Junior JB, Massad E, Lobao-Neto A, Kastner R, Oliver L, Gallagher E. Epidemiology and costs of Dengue in Brazil: A systematic literature review. *International Journal of Infectious Diseases*. 2022;122:521–8.

4. Watts MJ, Kotsila P, Mortyn PG, Sarto i Monteys V, Urzi Brancati C. Influence of socio-economic, demographic and climate factors on the regional distribution of Dengue in the United States and Mexico. *International Journal of Health Geographics*. 2020;19(1).
5. Bhatt S, Gething PW, Brady OJ, *et al*. The global distribution and burden of dengue. *Nature*. 2013; 496: 504-507. doi:10.1038/nature12060.
6. Morin, CW, Comrie, AC, Ernst, K. Climate and dengue transmission: evidence and implications. *Environ Health Persp*. 2013; 121(11-12): 1264. doi:10.1289/ehp.1306556.
7. Staples JE, Fischer M. Chikungunya virus in the Americas—what a vectorborne pathogen can do. *New Eng J of Med*. 2014; 371(10): 887-889. doi:10.1056/NEJMp1407698.
8. Kraemer MU, Sinka ME, Duda KA, *et al*. The global distribution of the arbovirus vectors *Aedes aegypti* and *Ae. albopictus*. *Elife*. 2015; 4: e08347. doi:10.7554/eLife.08347.
9. Ritchie SA, Devine GJ, Vazquez-Prokopec GM, Lenhart AE, Manrique-Saide P, Scott TW. 4. insecticide-based approaches for dengue vector control. *Ecology and Control of Vector-borne Diseases*. 2021;:59–89.
10. Villamil-Gómez WE, González-Camargo O, Rodríguez-Ayubi J, Zapata-Serpa D, Rodríguez-Morales AJ. Dengue, chikungunya and Zika co-infection in a patient from Colombia. *J Infect Public Health*. 2016;9(5):684-6. doi: 10.1016/j.jiph.2015.12.002.
11. Nakkhara P, Chongsuvivatwong V, Thammapalo S. Risk factors for symptomatic and asymptomatic chikungunya infection. *Trans R Soc Trop Med Hyg*. 2013; 107(12):789–96. doi:10.1093/trstmh/trt083.
12. Garcia Sánchez DC, Pinilla GA, Quintero J. Ecological characterization of *Aedes aegypti* larval habitats (Diptera: Culicidae) in artificial water containers in Girardot, Colombia. *J Vector Ecol*. 2017;42(2): 289–97. doi:10.1111/jvec.12269.
13. Zinszer K, Degroote S, Ridde V. Interventions for vector borne diseases focused on housing and hygiene in urban areas: a scoping review. *Infect Dis Poverty*. 2018; 7:96. doi:10.1186/s40249-018-0477-5.
14. DaBreo S. Inniss-Springer E.(2019)*Knowledge, Attitudes and Practices study: Baseline for the SMART Health Care Facilities in the Eastern Caribbean Project–Phase II*. Pan American Health Organization. Available from: [https://www.paho.org/disasters/index.php?option=com\\_docman&view=download&category\\_slug=news-caribbean&alias=2471-kap-report-baseline-for-smart-health-care-facilities-eastern-caribbean-project-phase-ii-1&Itemid=1179&lang=en](https://www.paho.org/disasters/index.php?option=com_docman&view=download&category_slug=news-caribbean&alias=2471-kap-report-baseline-for-smart-health-care-facilities-eastern-caribbean-project-phase-ii-1&Itemid=1179&lang=en)
15. Wang J, Chen L, Yu M, He J. Impact of knowledge, attitude, and practice (kap)-based rehabilitation education on the KAP of patients with intervertebral disc herniation. *Annals of Palliative Medicine*. 2020;9(2):388–93.
16. Zinszer K, Caprara A, Lima A, Degroote S, Zahreddine M, Abreu K, *et al*. Sustainable, healthy cities: Protocol of a mixed methods evaluation of a cluster randomized controlled trial for *Aedes* control in Brazil using a community mobilization approach. *Trials*. 2020;21(1).

17. Baig, M., Jameel, T., Alzahrani, S. H., Mirza, A. A., Gazzaz, Z. J., Ahmad, T., Baig, F., & Almurashi, S. H. (2020). Predictors of misconceptions, knowledge, attitudes, and practices of covid-19 pandemic among a sample of Saudi population. *PLOS ONE*, 15(12). <https://doi.org/10.1371/journal.pone.0243526>
18. Manual *Blood Collection and Handling – Dried Blood Spot (DBS)* (2005). Available at: [https://www.who.int/diagnostics\\_laboratory/documents/guidance/pm\\_module14.pdf](https://www.who.int/diagnostics_laboratory/documents/guidance/pm_module14.pdf). Accessed 20 Feb 2020.
19. Zou G. A modified Poisson regression approach to prospective studies with Binary Data. *American Journal of Epidemiology*. 2004;159(7):702–6.
20. IBGE – Instituto Brasileiro de Geografia e Estatística (Brazilian Institute for Geography and Statistics). 2010 Census.
21. Cost of living in Fortaleza [Internet]. Numbeo - Cost of living. 2022 [cited 2022Dec8]. Available from: <https://www.numbeo.com/cost-of-living/in/Fortaleza>
22. Pinchoff J, Silva M, Spielman K, Hutchinson P. Use of effective lids reduces presence of mosquito larvae in household water storage containers in urban and peri-urban Zika risk areas of Guatemala, Honduras, and El Salvador. *Parasites & Vectors*. 2021;14(1).
23. Luna EJA, Figueiredo GM, Levi JE, Campos SRSLC, Felix AC, Souza NS, et al. A cohort study to assess the incidence of Dengue, Brazil, 2014–2018. *Acta Tropica*. 2020;204:105313.
24. Shah PS, Alagarasu K, Karad S, Deoshatwar A, Jadhav SM, Raut T, et al. Seroprevalence and incidence of primary dengue infections among children in a rural region of Maharashtra, Western India. *BMC Infectious Diseases*. 2019;19(1).
25. Chiaravalloti-Neto F, da Silva RA, Zini N, da Silva GC, da Silva NS, Parra MC, et al. Seroprevalence for dengue virus in a hyperendemic area and associated socioeconomic and demographic factors using a cross-sectional design and a geostatistical approach, state of São Paulo, Brazil. *BMC Infectious Diseases*. 2019;19(1).
26. Selvarajoo S, Liew JW, Tan W, Lim XY, Refai WF, Zaki RA, et al. Knowledge, attitude and practice on Dengue Prevention and Dengue Seroprevalence in a dengue hotspot in Malaysia: A cross-sectional study. *Scientific Reports*. 2020;10(1).
27. Sierra Bde, Kouri G, Guzmán MG. Race: A risk factor for dengue hemorrhagic fever. *Archives of Virology*. 2006;152(3):533–42.
28. Paradies Y, Ben J, Denson N, Elias A, Priest N, Pieterse A, et al. Racism as a determinant of health: A systematic review and meta-analysis. *PLOS ONE*. 2015;10(9).
29. Anker M, Arima Y. Male-female differences in the number of reported incident dengue fever cases in six Asian countries. *Western Pacific Surveillance and Response*. 2011;2(2).
30. Ooi E-E, Goh K-T, Gubler DJ. Dengue prevention and 35 years of Vector Control in Singapore. *Emerging Infectious Diseases*. 2006;12(6):887–93.

31. Piedrahita LD, Agudelo Salas IY, Marin K, Trujillo AI, Osorio JE, Arboleda-Sanchez SO, et al. Risk factors associated with dengue transmission and spatial distribution of high seroprevalence in schoolchildren from the urban area of Medellin, Colombia. *Canadian Journal of Infectious Diseases and Medical Microbiology*. 2018;2018:1–11.
32. Verma RK, Kumar M, Nirjhar S, Singh M. Dengue in children and young adults, a cross-sectional study from the western part of Uttar Pradesh. *Journal of Family Medicine and Primary Care*. 2020;9(1):293.
33. Sabchareon A, Sirivichayakul C, Limkittikul K, Chanthavanich P, Suvannadabba S, Jiwariyavej V, et al. Dengue infection in children in Ratchaburi, Thailand: A cohort study. I. Epidemiology of symptomatic acute dengue infection in children, 2006–2009. *PLoS Neglected Tropical Diseases*. 2012;6(7).
34. Astuti EP, Dhewantara PW, Prasetyowati H, Ipa M, Herawati C, Hendrayana K. Paediatric dengue infection in Cirebon, Indonesia: A temporal and spatial analysis of notified dengue incidence to inform surveillance. *Parasites & Vectors*. 2019;12(1).
35. Shah PS, Alagarasu K, Karad S, Deoshatwar A, Jadhav SM, Raut T, et al. Seroprevalence and incidence of primary dengue infections among children in a rural region of Maharashtra, Western India. *BMC Infectious Diseases*. 2019;19(1).
36. Thai KT, Nishiura H, Hoang PL, Tran NT, Phan GT, Le HQ, et al. Age-specificity of clinical dengue during primary and secondary infections. *PLoS Neglected Tropical Diseases*. 2011;5(6).
37. Ng RJ, Chong ZL, Abdul Mutalip MH, Ng C-W. Dengue seroprevalence and factors associated with dengue seropositivity in Petaling District, Malaysia. *International Journal of Environmental Research and Public Health*. 2022;19(12):7170.
38. Rossen RD, Birdsall HH. Allergy and immunology. *Medical Secrets*. 2012;:291–343.
39. Hernández-Suárez CM, Mendoza-Cano O. Empirical evidence of the effect of school gathering on the dynamics of dengue epidemics. *Global Health Action*. 2016;9(1):28026.
40. Ooi EE, Hart TJ, Tan HC, Chan SH. Dengue Seroepidemiology in Singapore. *The Lancet*. 2001;357(9257):685–6.
41. Endy TP. Spatial and temporal circulation of dengue virus serotypes: A prospective study of Primary School Children in Kamphaeng Phet, Thailand. *American Journal of Epidemiology*. 2002;156(1):52–9.
42. Diaz-Quijano FA, Martínez-Vega RA, Rodriguez-Morales AJ, Rojas-Calero RA, Luna-González ML, Díaz-Quijano RG. Association between the level of education and knowledge, attitudes and practices regarding dengue in the Caribbean region of Colombia. *BMC Public Health*. 2018;18(1).
43. Murray N, Jansarikij S, Olanratmanee P, Maskhao P, Souares A, Wilder-Smith A, et al. Acceptability of impregnated school uniforms for dengue control in Thailand: A mixed methods approach. *Global Health Action*. 2014;7(1):24887.
44. Soghaier MA, Mahmood SF, Pasha O, Azam SI, Karsani MM, Elmangory MM, et al. Factors associated with dengue fever IGG sero-prevalence in South Kordofan State,

- Sudan, in 2012: Reporting prevalence ratios. *Journal of Infection and Public Health*. 2014;7(1):54–61.
45. Vannavong N, Seidu R, Stenström T-A, Dada N, Overgaard HJ. Effects of socio-demographic characteristics and household water management on *Aedes aegypti* production in suburban and rural villages in Laos and Thailand. *Parasites & Vectors*. 2017;10(1).
  46. Suwanbamrung C, Saengsuwan B, Sangmanee T, Thrikaew N, Srimoung P, Maneerattanasak S. Knowledge, attitudes, and practices towards dengue prevention among primary school children with and without experience of previous dengue infection in Southern Thailand. *One Health*. 2021;13:100275.
  47. Herbuela VR, de Guzman FS, Sobrepeña GD, Claudio AB, Tomas AC, Arriola-delos Reyes CM, et al. Knowledge, attitude, and practices regarding dengue fever among pediatric and adult in-patients in Metro Manila, Philippines. *International Journal of Environmental Research and Public Health*. 2019;16(23):4705.
  48. Daag JV, Ylade M, Jadi R, Adams C, Cuachin AM, Alpay R, et al. Performance of dried blood spots compared with serum samples for measuring dengue seroprevalence in a cohort of children in Cebu, Philippines. *The American Journal of Tropical Medicine and Hygiene*. 2021;104(1):130–5.
  49. Krentel A, Basker N, Beau de Rochars M, Bogus J, Dilliott D, Direny AN, et al. A multicenter, community-based, mixed methods assessment of the acceptability of a triple drug regimen for elimination of lymphatic filariasis. *PLOS Neglected Tropical Diseases*. 2021;15(3).
